# Supplementary material
Source: Royal Society of Chemistry journal article supplement (doi:10.1039/d6tb00011h)
Supplement: d6tb00011h1.pdf [file d6tb00011h1.pdf]

## Supplementary Information

### Universal Gd<sup>3+</sup>-based Hydrogel Matrix Hydrogel Matrix for Room-Temperature Phosphorescence Inducing

Jiazhuo Li,<sup>a</sup> Ying Wang,<sup>b</sup> Zhiyun Lu<sup>a</sup> and Peng Wu<sup>a, b, \*</sup>

<sup>a</sup> College of Chemistry, Sichuan University, Chengdu 610064, China

<sup>b</sup> Analytical & Testing Center, Sichuan University, Chengdu 610064, China

\*Corresponding authors' E-mail: wupeng@scu.edu.cn

## Table of Contents

|                                                                      |    |
|----------------------------------------------------------------------|----|
| Section S1. Experimental Section .....                               | 3  |
| S1.1 Materials .....                                                 | 3  |
| S1.2 Apparatus .....                                                 | 5  |
| S1.3 Experimental Information.....                                   | 6  |
| Section S2. Materials Characterization .....                         | 9  |
| Section S3. Spectroscopic characterization of ThT gel.....           | 11 |
| Section S4. Universal hydrogel matrix for inducing aqueous RTP ..... | 14 |
| Section S5. PtTCPP gel for bioimaging.....                           | 17 |
| Section S6. Guest gel for information coding. ....                   | 18 |
| Section S7. Construction of white light-emitting hydrogel.....       | 19 |

## Section S1. Experimental Section

### S1.1 Materials

The detailed information on the materials was given in Table S1.

**Table S1.** The information on the materials used in this work.

| Name                                                                      | CAS No.     | Specification | Supplier                        |
|---------------------------------------------------------------------------|-------------|---------------|---------------------------------|
| adenosine<br>5'-<br>monophosphatedisodium salt (AMP)                      | 4578-31-8   | 99%           | Aladdin,<br>Shanghai, China     |
| Gadolinium chloride hexahydrate<br>(GdCl <sub>3</sub> ·6H <sub>2</sub> O) | 13450-84-5  | 99.9%         | Aladdin,<br>Shanghai, China     |
| N-2-hydroxyethyl piperazine-N'-2-<br>taurine (HEPES)                      | 7365-45-9   | 99%           | Aladdin,<br>Shanghai, China     |
| Thioflavin T (ThT)                                                        | 2390-54-7   | -             | Aladdin,<br>Shanghai, China     |
| Thiazol Orange (TO)                                                       | 107091-89-4 | ~90%          | Aladdin,<br>Shanghai, China     |
| Rhodol                                                                    | 3086-44-0   | > 98%         | Aladdin,<br>Shanghai, China     |
| Pt(II) meso-tetra (4-carboxyphenyl)<br>porphine (PtTCPP)                  | 94288-45-6  | > 98%         | frontier scientific,<br>America |
| 1-pyrenecarboxylic acid (PCA)                                             | 19694-02-1  | > 97%         | Aladdin,<br>Shanghai, China     |
| 1,8-Naphthalimide (NpA)                                                   | 81-83-4     | > 98%         | Aladdin,<br>Shanghai, China     |
| [1,1'-Biphenyl]-3,3',4,4'-<br>tetracarboxylic acid (BPDA)                 | 22803-05-0  | > 98%         | Aladdin,<br>Shanghai, China     |
| Lanthanum chloride hexahydrate<br>(LaCl <sub>3</sub> ·6H <sub>2</sub> O)  | 17272-45-6  | 99.99%        | Aladdin,<br>Shanghai, China     |

|                                                                                      |            |        |                                    |
|--------------------------------------------------------------------------------------|------------|--------|------------------------------------|
| Cerium chloride hexahydrate<br>(CeCl <sub>3</sub> ·6H <sub>2</sub> O)                | 16651-27-7 | 99.99% | Aladdin,<br>Shanghai, China        |
| Praseodymium chloride hexahydrate<br>(PrCl <sub>3</sub> ·6H <sub>2</sub> O)          | 10025-90-8 | 99%    | Aladdin,<br>Shanghai, China        |
| Neodymium chloride hexahydrate<br>(NdCl <sub>3</sub> ·6H <sub>2</sub> O)             | 13477-89-9 | 99.9%  | Aladdin,<br>Shanghai, China        |
| Samarium chloride hexahydrate<br>(SmCl <sub>3</sub> ·6H <sub>2</sub> O)              | 13465-55-9 | 99%    | Aladdin,<br>Shanghai, China        |
| Europium chloride hexahydrate<br>(EuCl <sub>3</sub> ·6H <sub>2</sub> O)              | 13759-92-7 | 99.9%  | Aladdin,<br>Shanghai, China        |
| Terbium chloride hexahydrate<br>(TbCl <sub>3</sub> ·6H <sub>2</sub> O)               | 13798-24-8 | 99.9%  | frontier scientific,<br>America    |
| Dysprosium chloride hexahydrate<br>(DyCl <sub>3</sub> ·6H <sub>2</sub> O)            | 15059-52-6 | 99.9%  | Aladdin,<br>Shanghai, China        |
| Holmium chloride hexahydrate<br>(HoCl <sub>3</sub> ·6H <sub>2</sub> O)               | 14914-84-2 | 99.9%  | Aladdin,<br>Shanghai, China        |
| Erbium nitrate hexahydrate<br>(Er(NO <sub>3</sub> ) <sub>3</sub> ·6H <sub>2</sub> O) | 13476-05-6 | 99.99% | Aladdin,<br>Shanghai, China        |
| Thulium chloride hexahydrate<br>(TmCl <sub>3</sub> ·6H <sub>2</sub> O)               | 1331-74-4  | 99.99% | Aladdin,<br>Shanghai, China        |
| Ytterbium chloride hexahydrate<br>(YbCl <sub>3</sub> ·6H <sub>2</sub> O)             | 10035-01-5 | 99.99% | Aladdin,<br>Shanghai, China        |
| Lutecium chloride hexahydrate<br>(LuCl <sub>3</sub> ·6H <sub>2</sub> O)              | 15230-79-2 | 99.9%  | Aladdin,<br>Shanghai, China        |
| Yttrium chloride hexahydrate<br>(YCl <sub>3</sub> ·6H <sub>2</sub> O)                | 10025-94-2 | 99.9%  | frontier scientific,<br>America    |
| 22AG DNA                                                                             | -          | -      | Sangon Biotech,<br>Shanghai, China |

## S1.2 Apparatus

All the instrumental information used for characterizations was given in Table S2.

**Table S2.** The instrumental information used in this work.

| Characterization items                              | Type                                                                                                          | Manufacturer                                     |
|-----------------------------------------------------|---------------------------------------------------------------------------------------------------------------|--------------------------------------------------|
| UV/Vis absorption spectra                           | Lambda-365 spectrometer                                                                                       | Perkin Elmer, USA                                |
| Fourier Transform infrared spectra                  | INVENIO®R                                                                                                     | Bruker, Germany                                  |
| PL spectra & time-resolved emission spectrum (TRES) | FluoroMax-4P spectrofluorometer                                                                               | Horiba Scientific, USA                           |
| Phosphorescence lifetime & QY                       | Fluolog-3 spectrofluorometer with an integration sphere (IS80, Labsphere)<br>Lifetime excitation: Spectra LED | Horiba Jobin Yvon, USA                           |
| Scanning electron microscope                        | JSM-7500F                                                                                                     | Japan electron optics laboratory co., ltd, Japan |
| Transmission electron microscope                    | Tecnai G2 F20 S-TWIN                                                                                          | FEI, USA                                         |
| Confocal Laser Microscope                           | N-SIM/A1R MP+                                                                                                 | Nikon, Japan                                     |
| Dynamic frequency sweep                             | Kinexus Prime lab+                                                                                            | NETZSCH, Germany                                 |
| X-ray Photoelectron Spectroscopy                    | AXIS Ultra DLD                                                                                                | Kratos, England                                  |

### **S1.3 Experimental Information**

**Preparation of Gd<sup>3+</sup>-AMP hydrogel.** Adenosine 5'-monophosphate sodium salt (AMP, 100 mM, 1 mL) was dissolved in HEPES buffer (100 mM, pH 7.4), then GdCl<sub>3</sub> solution (10 mM, 1 mL) was added dropwise. Then the mixture was stirred for 2 h at room temperature.

**Preparation of dye gels.** Potential phosphorescent molecules (10 mM in DMSO, 20  $\mu$ L) were mixed with AMP solution (100 mM in HEPES buffer, 1 mL). Then, GdCl<sub>3</sub> solution (10 mM, 1 mL) was dropwise added with stirring to obtain dye-doped hydrogels (dye gel).

**Preparation of ThT @ G4.** ThT (100  $\mu$ M, 1 mL) was dissolved in Tris buffer (50 mM, pH 7.2), then 22AG DNA (12.5  $\mu$ M, 1 mL) was added with stirring to obtain ThT@G4.

**Characterization of hydrogels.** Transmission Electron Microscopy (TEM) was performed on a Philips CM10 microscope. A drop of sample dispersion (1 mg/mL) was placed on a 230-mesh holey carbon copper grid. After 30 s, the excess solution was removed by a piece of filter paper. The above prepared hydrogel was lyophilized to obtain solid powders for X-Ray Diffraction (XRD), Scanning Electron Microscope (SEM), and Fourier Transform Infrared Spectroscopy (FTIR) analysis.

**Phosphorescence measurements.** Phosphorescence spectra of the dye gels were recorded using a HORIBA FluoroMax-4P spectrofluorometer with a delay time of 0.1 ms. The phosphorescence lifetimes and the time-resolved emission spectra (TRES) of

dye gels were collected on the HORIBA FluoroLog-3 spectrofluorometer with spectra LEDs as the excitation sources. The phosphorescence quantum yields ( $\Phi_p$ ) of dye gels were measured in an integrating sphere (IS80, Labsphere).

**Photoluminescence quantum yield.** Absolute quantum yield ( $\Phi$ ) of dye gel was measured by the Fluolog-3 spectrofluorometer with an integration sphere (IS80, Labsphere) in this work. The peak areas of fluorescence emission, RTP emission, and integration absorption are integrated by Origin 2016.

***In vitro* imaging.** For cell imaging, L929 mouse fibroblast cells and 4T1 breast cancer cells were chosen as the model. PtTCPP (100  $\mu$ L to 1 mL culture medium) was added to confocal dishes containing  $10^5$  cells, and co-incubated for different times. The excitation wavelength was 405 nm, and the Cy5 channel was used to collect the phosphorescence emission.

***In vivo* imaging.** Healthy female BALB/c mice were chosen in this work. To establish a tumor-bearing model,  $10^6$  4T1 cells in 100  $\mu$ L PBS were subcutaneously injected, then waited for 1 week. Through intratumorally injecting 50  $\mu$ L PtTCPP and PtTCPP gel, the photographs of mice were collected by the IVIS imaging system.

**Three-dimensional code establishment.** Guest gels were prepared as above. Then, the hydrogels were added to square molds and slightly dried to form the 3D code. For scanning, the code was taken with a smartphone app, namely 3D code.

**White light-emitting hydrogel.** PtTCPP (20 mM in DMSO, 5  $\mu$ L) and ThT (20 mM in DMSO, 35  $\mu$ L) were mixed with AMP solution (100 mM in HEPES buffer, 1 mL). Then, GdCl<sub>3</sub> solution (10 mM, 1 mL) was dropwise added with stirring to obtain PtTCPP and ThT co-encapsulated white light hydrogels (PtTCPP & ThT gel). The water contents were calculated through weighing hydrogels before and after drying.

## Section S2. Materials Characterization

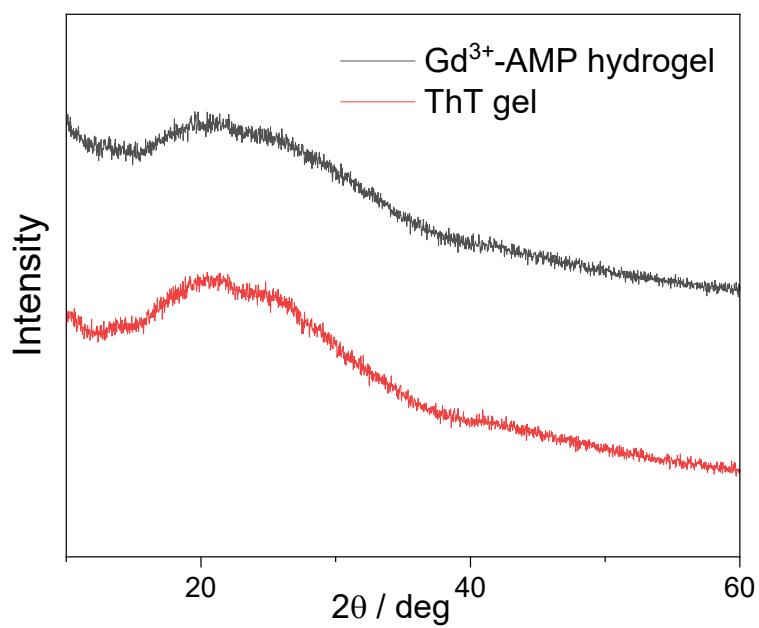

**Figure S1.** XRD of Gd<sup>3+</sup>-AMP hydrogel and ThT gel.

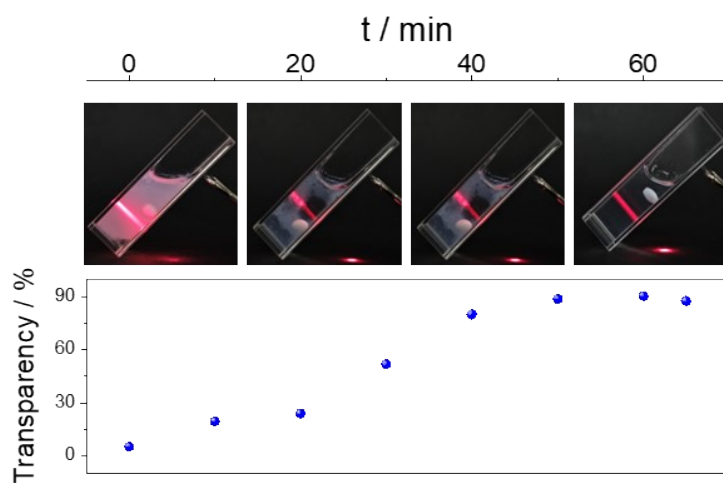

**Figure S2.** Photographs at predesigned time intervals in Gd<sup>3+</sup>-AMP hydrogel formation.

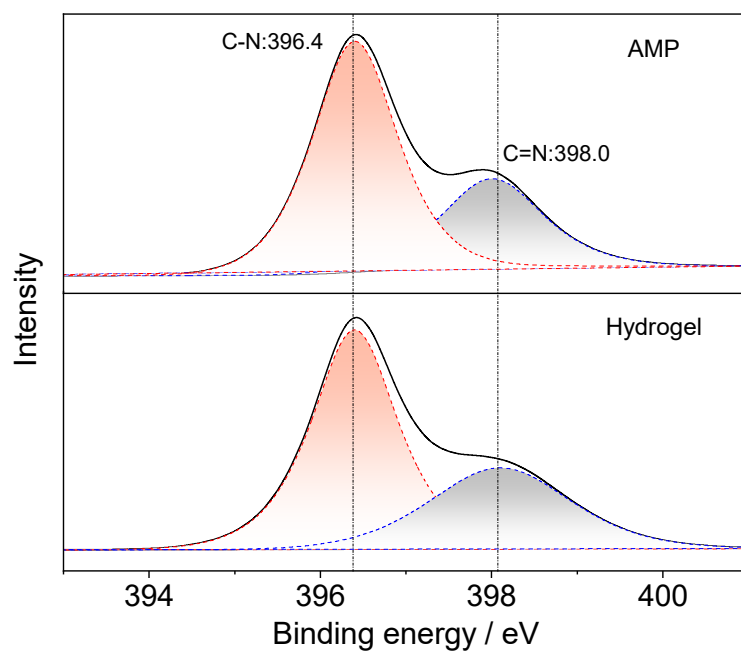

**Figure S3.** N 1s XPS spectra of AMP and Gd-AMP hydrogel.

### Section S3. Spectroscopic characterization of ThT gel

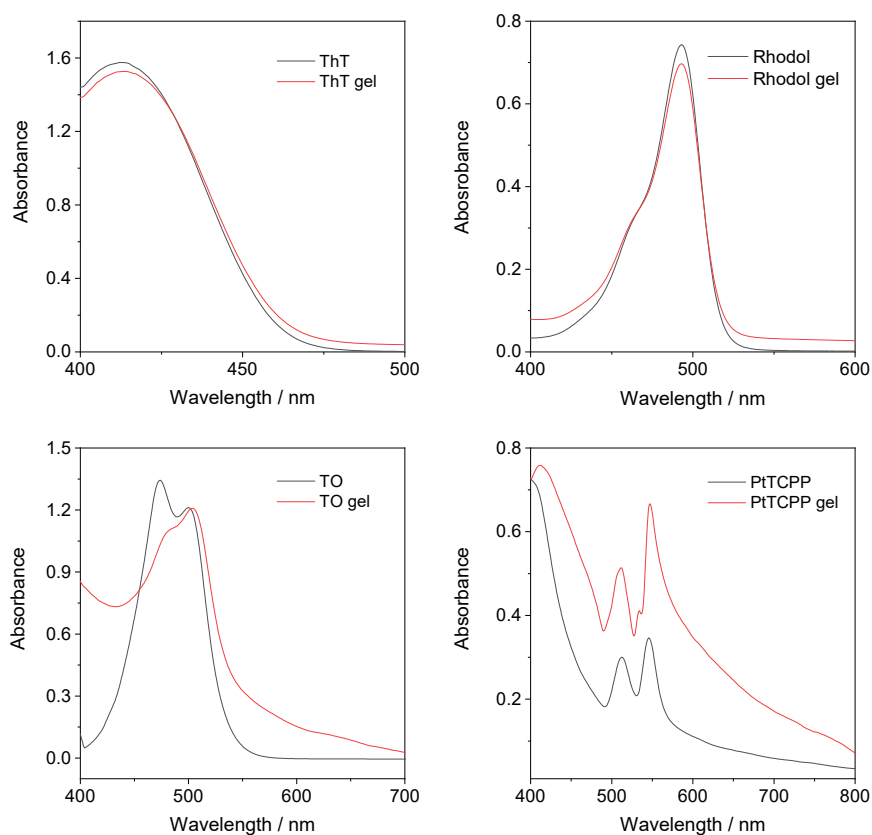

**Figure S4.** UV/vis absorption spectra of dye@Gd<sup>3+</sup>-AMP hydrogel (red line, without centrifugation) and corresponding aqueous dye (black line, [dye] = 62.5 mM). Quartz cell with a 1 cm path length was used.

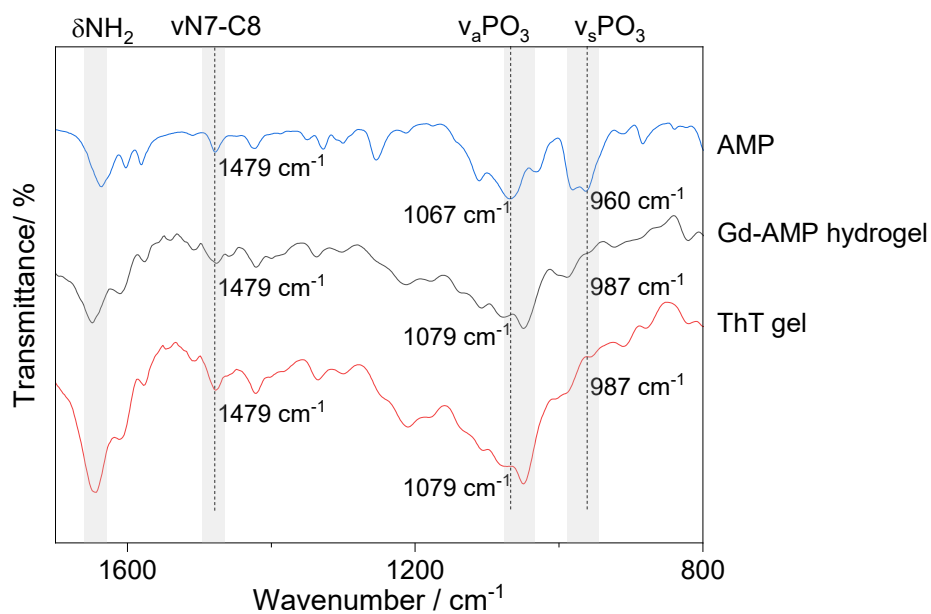

**Figure S5.** FTIR spectra of AMP, Gd-AMP hydrogel and ThT gel.

**Table S3.** Changes in wavenumbers of stretching vibrations in Figure S5.

|                      | wavenumber (cm <sup>-1</sup> ) |                               |                               |
|----------------------|--------------------------------|-------------------------------|-------------------------------|
|                      | $\nu(\text{N7-C8})$            | $\nu_{\text{a}}(\text{PO}_3)$ | $\nu_{\text{s}}(\text{PO}_3)$ |
| 5'-AMP disodium salt | 1479                           | 1067                          | 960                           |
| Gd-AMP hydrogel      | 1479                           | 1079                          | 987                           |
| ThT gel              | 1479                           | 1079                          | 987                           |

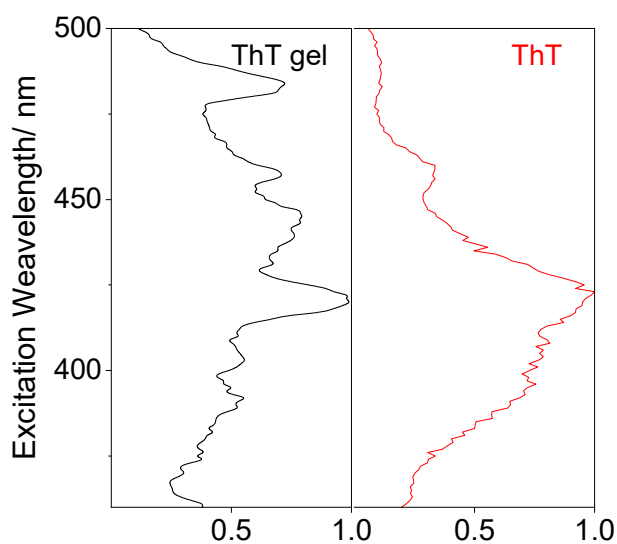

**Figure S6.** Phosphorescence excitation of free ThT and ThT gel ( $\lambda_{\text{em}} = 570 \text{ nm}$ ).

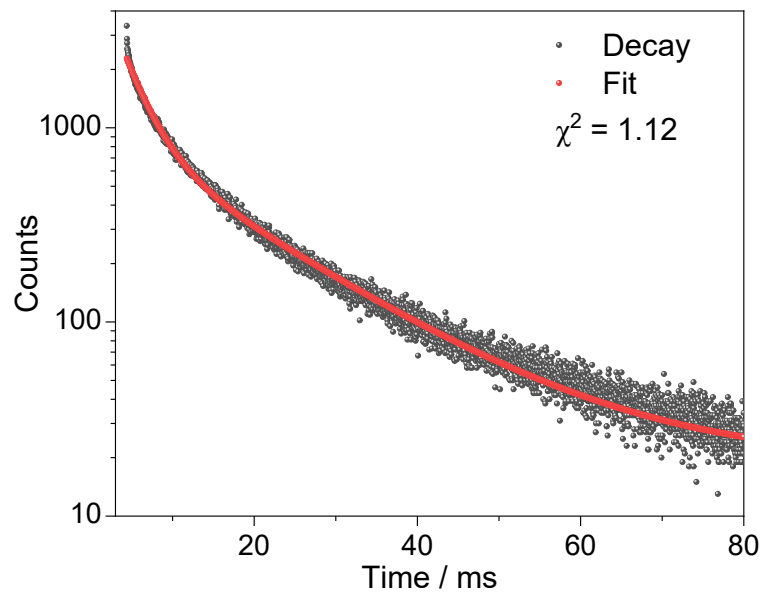

**Figure S7.** Phosphorescence lifetimes of ThT gel ( $\lambda_{em} = 570$  nm).

## Section S4. Universal hydrogel matrix for inducing aqueous RTP

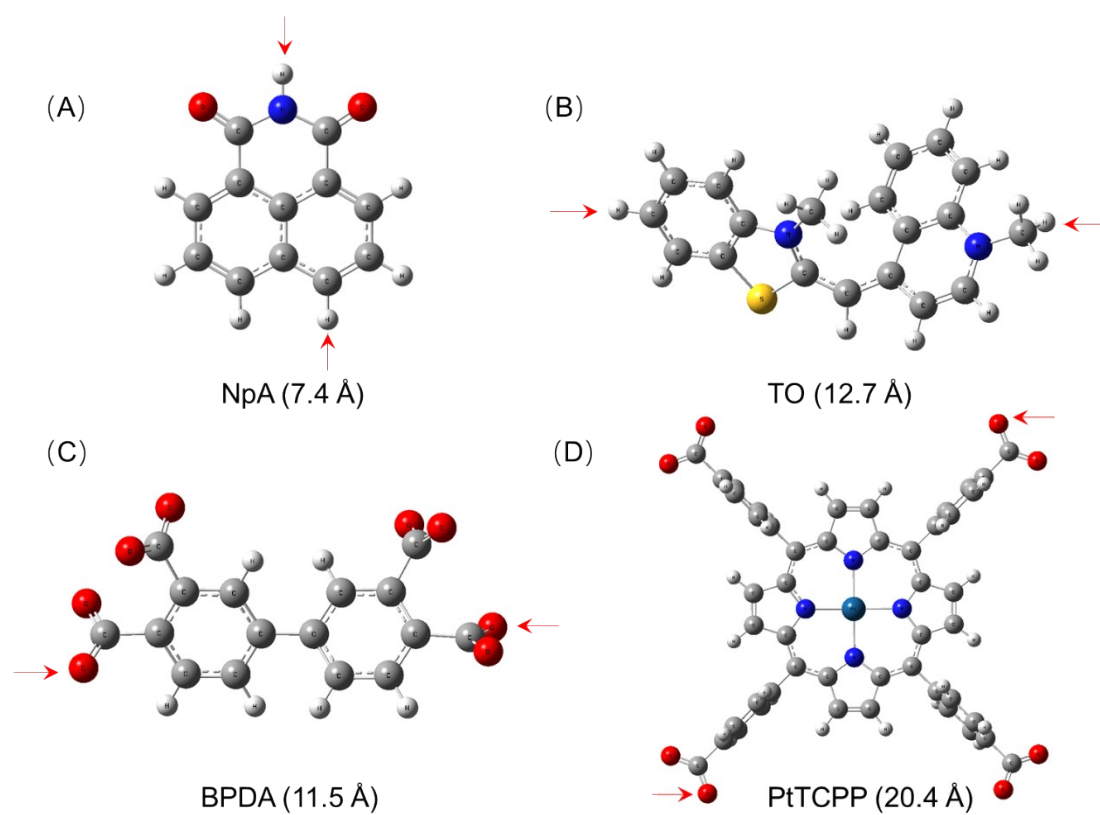

**Figure S8.** The optimized molecular structures of NpA, TO, BPDA and PtTCPP.

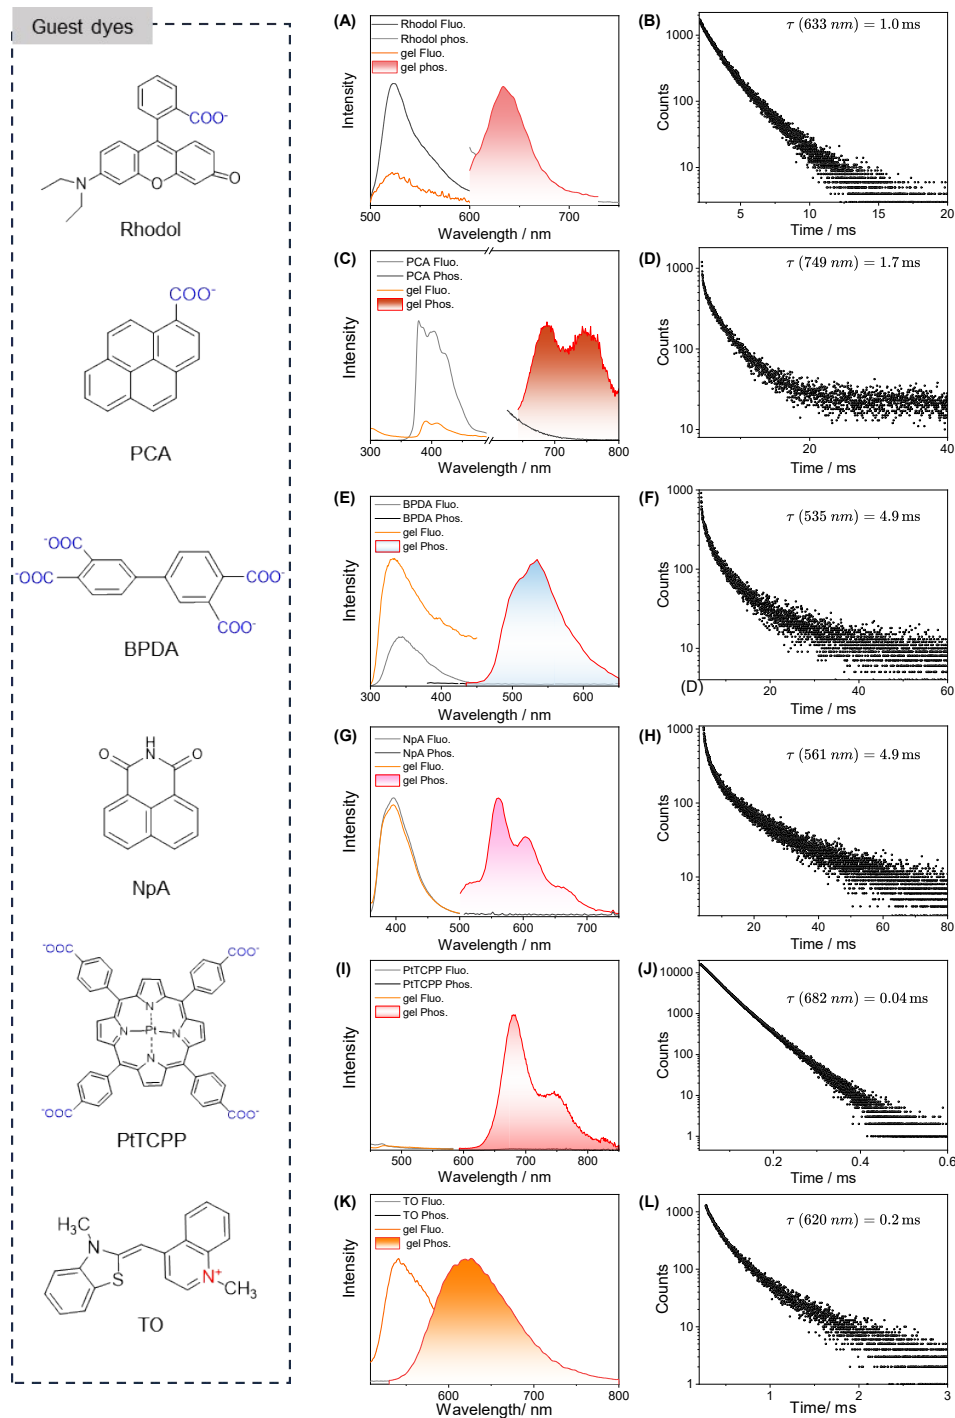

**Figure S9.** The steady-state and delayed emission spectra of (A) Rhodol and Rhodol gel; (C) PCA and PCA gel; (E) BPDA and BPDA gel; (G) NpA and NpA gel; (I) PtTCPP and PtTCPP gel; (K) TO and TO gel; the phosphorescence lifetimes of (B) Rhodol and Rhodol gel ( $\lambda_{em} = 633$  nm); (D) PCA and PCA gel ( $\lambda_{em} = 749$  nm); (F) BPDA and BPDA gel ( $\lambda_{em} = 535$  nm); (H) NpA and NpA gel ( $\lambda_{em} = 561$  nm); (J) PtTCPP and PtTCPP gel ( $\lambda_{em} = 682$  nm); (L) TO and TO gel ( $\lambda_{em} = 620$  nm).

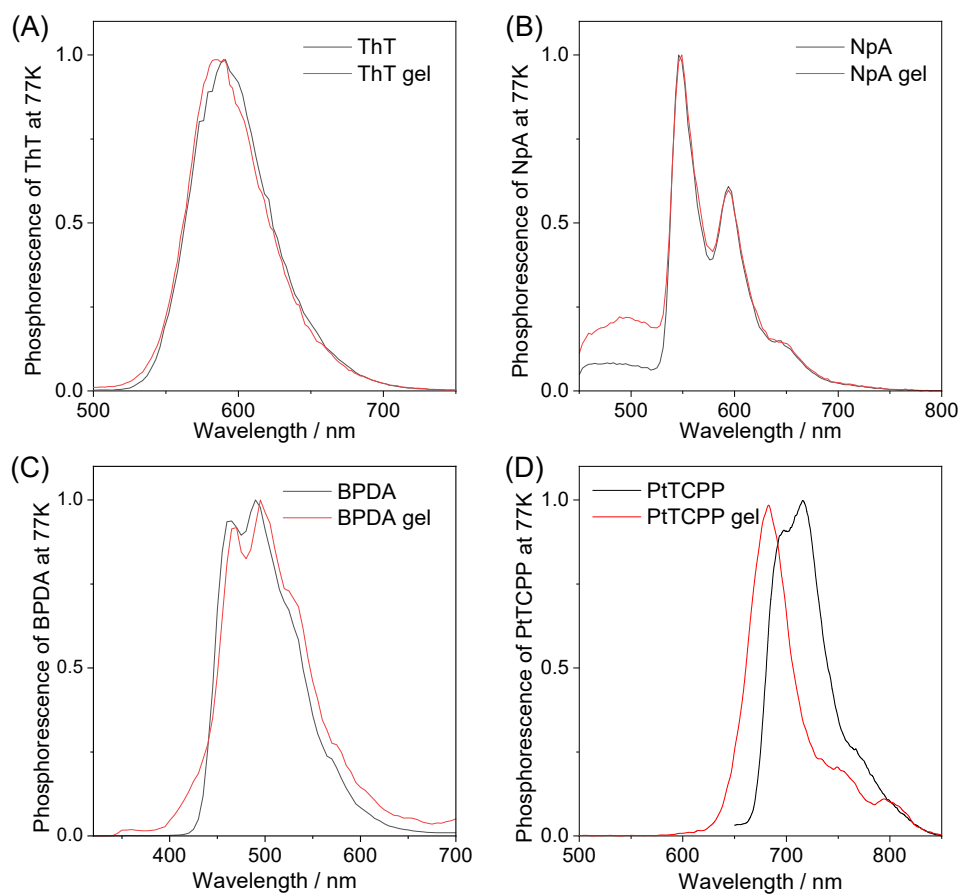

**Figure S10.** Phosphorescence spectra of (A) ThT and ThT gel, (B) NpA and NpA gel, (C) BPDA and BPDA gel, (D) PtTCPP and PtTCPP gel under 77K.

**Section S5. PtTCPP gel for bioimaging.**

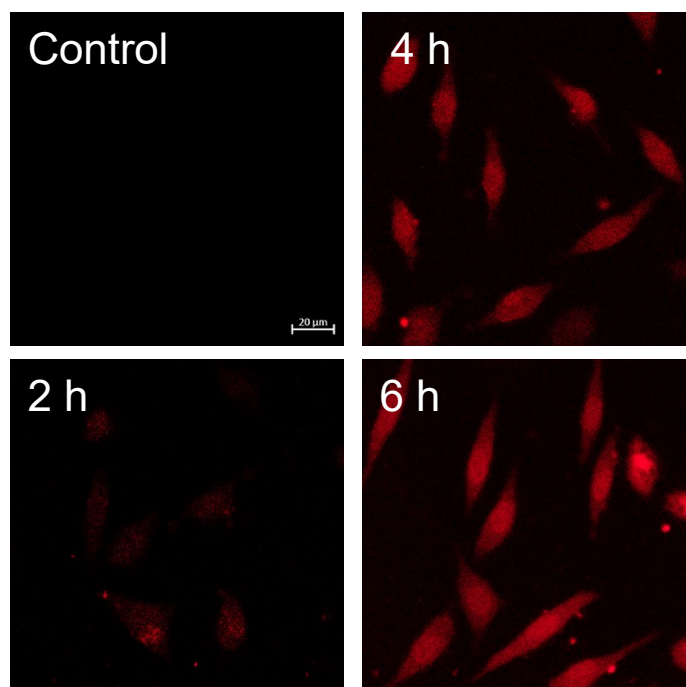

**Figure S11.** Phosphorescence confocal imaging of L929 cells with different incubation times.

## Section S6. Guest gel for information coding.

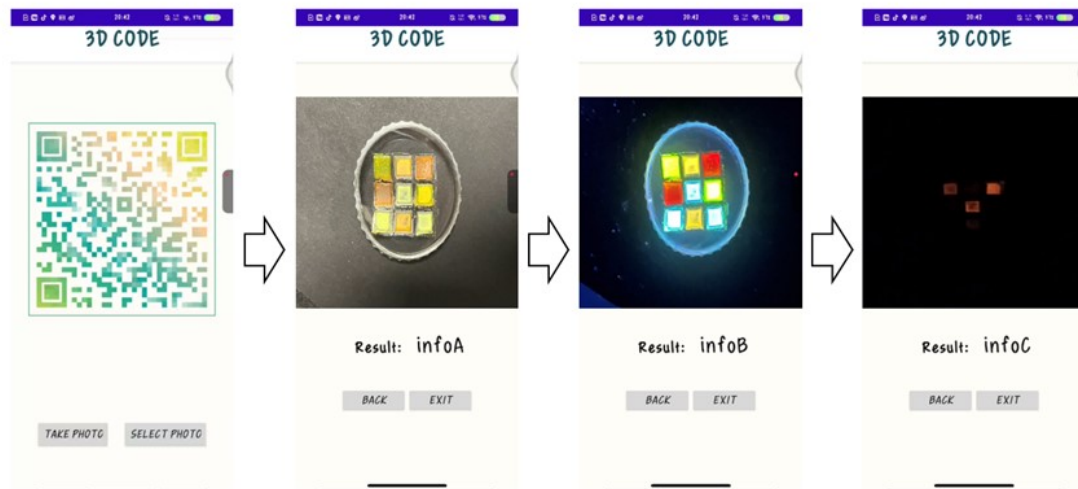

**Figure S12.** The process of using smart phone app to read out information.

## Section S7. Construction of white light-emitting hydrogel.

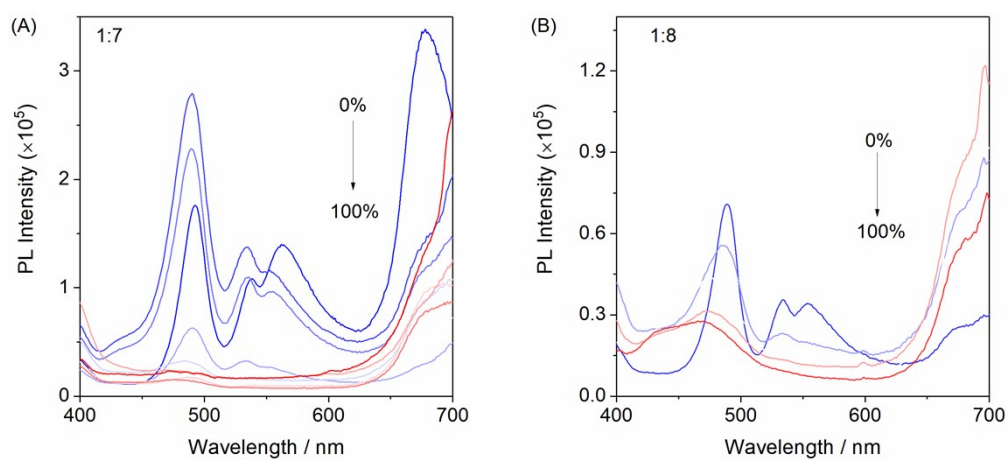

**Figure S13.** PL spectra of ThT and PtTCPP co-encapsulated hydrogels with different water contents: (A) ThT : PtTCPP = 1:7; (B) ThT : PtTCPP = 1:8.
